# Supplementary material for: Repurposing Lovastatin Cytotoxicity against the Tongue Carcinoma HSC3 Cell Line Using a Eucalyptus Oil-Based Nanoemulgel Carrier
Source: MDPI journal article supplement (doi:10.3390/gels8030176), 2022-03-12
Supplement: s1 [file s1]

Supplementary Materials

# Repurposing Lovastatin Cytotoxicity against the Tongue Carcinoma HSC3 Cell Line Using a Eucalyptus Oil-Based Nanoemulgel Carrier

Waleed Y. Rizg <sup>1,2, \*</sup>, Khaled M. Hosny <sup>1,2</sup>, Samar S. Mahmoud <sup>3</sup>, Ahmed K. Kammoun <sup>4</sup>, Abdulmohsin J. Alamoudi <sup>5</sup>, Hossam H. Tayeb <sup>6,7</sup>, Haitham A. Bukhary <sup>8</sup>, Moutaz Y. Badr <sup>8</sup>, Samar S. A. Murshid <sup>9</sup>, Eman Alfayez <sup>10</sup>, Sarah A. Ali <sup>11</sup>, Rayan Y. Mushtaq <sup>12</sup>, and Walaa A. Abualsunun <sup>1</sup>

**Table S1.** Input data on k=5 independent treatments.

| Treatment →  | A   | B   | C   | D   | E  |
|--------------|-----|-----|-----|-----|----|
| Input Data → | 890 | 400 | 320 | 610 | 55 |
|              | 894 | 376 | 350 | 600 | 46 |
|              | 863 | 380 | 365 | 635 | 60 |
|              | 883 | 376 | 368 | 705 | 59 |
|              | 639 | 433 | 300 | 756 | 48 |
|              | 694 | 440 | 280 | 759 | 64 |

One-way ANOVA with post-hoc Tukey HSD Test For Capsase-3enzyme results with Scheffé, Bonferroni and Holm multiple comparison calculation also provided

**Table S2.** Descriptive statistics of your k=5 independent treatments.

| Treatment →                      | A                   | B                 | C                 | D                   | E                | Pooled Total        |
|----------------------------------|---------------------|-------------------|-------------------|---------------------|------------------|---------------------|
| observations N                   | 6                   | 6                 | 6                 | 6                   | 6                | 30                  |
| Sum $\sum x_i$                   | 4,863.0000          | 2,405.0000        | 1,983.0000        | 4,065.0000          | 332.0000         | 13,648.0000         |
| Mean $\bar{x}$                   | 810.5000            | 400.8333          | 330.5000          | 677.5000            | 55.3333          | 454.9333            |
| sum of squares $\sum x_i^2$      | 4,005,751.0000<br>0 | 968,241.0000<br>0 | 661,949.0000<br>0 | 2,779,967.0000<br>0 | 18,622.0000<br>0 | 8,434,530.0000<br>0 |
| sample variance $s^2$            | 12,857.9000         | 847.3667          | 1,313.5000        | 5,185.9000          | 50.2667          | 76,744.8230         |
| sample std. dev. s               | 113.3927            | 29.1096           | 36.2422           | 72.0132             | 7.0899           | 277.0286            |
| std. dev. of mean $SE_{\bar{x}}$ | 46.2924             | 11.8839           | 14.7958           | 29.3993             | 2.8944           | 50.5783             |

**Table S3.** One-way ANOVA of your k=5 independent treatments.

| source    | sum of squares SS | degrees of freedom vv | mean square MS | F statistic | p-value    |
|-----------|-------------------|-----------------------|----------------|-------------|------------|
| treatment | 2,124,325.2000    | 4                     | 531,081.3000   | 131.0992    | 2.2204e-16 |
| error     | 101,274.6667      | 25                    | 4,050.9867     |             |            |
| total     | 2,225,599.8667    | 29                    |                |             |            |

**Table S4.** Scheffé results.

| treatments pair | Scheffé TT-statistic | Scheffé p-value           | Scheffé inference |
|-----------------|----------------------|---------------------------|-------------------|
| A vs B          | 11.1484              | 2.2708 x10 <sup>-9</sup>  | p<0.01            |
| A vs C          | 13.0624              | 8.0739 x10 <sup>-11</sup> | p<0.01            |
| A vs D          | 3.6194               | 0.0273414                 | p<0.05            |
| A vs E          | 20.5505              | 2.7756 x10 <sup>-15</sup> | p<0.01            |
| B vs C          | 1.9140               | 0.4701396                 | insignificant     |
| B vs D          | 7.5290               | 3.6144 x10 <sup>-6</sup>  | p<0.01            |
| B vs E          | 9.4022               | 6.6485 x10 <sup>-8</sup>  | p<0.01            |
| C vs D          | 9.4430               | 6.1203 x10 <sup>-8</sup>  | p<0.01            |
| C vs E          | 7.4882               | 3.9594 x10 <sup>-6</sup>  | p<0.01            |
| D vs E          | 16.9312              | 2.5113 x10 <sup>-13</sup> | p<0.01            |

**Table S5.** Bonferroni and Holm results: all pairs simultaneously compared.

| treatments pair | Bonferroni and Holm TT-statistic | Bonferroni p-value        | Bonferroni inference | Holm p-value              | Holm inference |
|-----------------|----------------------------------|---------------------------|----------------------|---------------------------|----------------|
| A vs B          | 11.1484                          | 3.4219 x10 <sup>-10</sup> | p<0.01               | 2.3953x10 <sup>-10</sup>  | p<0.01         |
| A vs C          | 13.0624                          | 1.1413 x10 <sup>-11</sup> | p<0.01               | 9.1305 x10 <sup>-12</sup> | p<0.01         |
| A vs D          | 3.6194                           | 0.0130732                 | p<0.05               | 0.0026146                 | p<0.01         |
| A vs E          | 20.5505                          | 0.0000                    | p<0.01               | 0.000                     | p<0.01         |

|        |         |                          |               |                          |               |
|--------|---------|--------------------------|---------------|--------------------------|---------------|
| B vs C | 1.9140  | 0.6713473                | insignificant | 0.0671347                | insignificant |
| B vs D | 7.5290  | $6.9749 \times 10^{-7}$  | $p < 0.01$    | $2.7900 \times 10^{-7}$  | $p < 0.01$    |
| B vs E | 9.4022  | $1.0960 \times 10^{-8}$  | $p < 0.01$    | $5.4800 \times 10^{-9}$  | $p < 0.01$    |
| C vs D | 9.4430  | $1.0063 \times 10^{-8}$  | $p < 0.01$    | $6.0379 \times 10^{-9}$  | $p < 0.01$    |
| C vs E | 7.4882  | $7.6751 \times 10^{-7}$  | $p < 0.01$    | $2.3025 \times 10^{-7}$  | $p < 0.01$    |
| D vs E | 16.9312 | $3.3307 \times 10^{-14}$ | $p < 0.01$    | $2.9976 \times 10^{-14}$ | $p < 0.01$    |

**Table S6.** Bonferroni and Holm results: only pairs relative to a simultaneously compared.

| treatments pair | Bonferroni and Holm TT-statistic | Bonferroni p-value       | Bonferroni inference | Holm p-value             | Holm inference |
|-----------------|----------------------------------|--------------------------|----------------------|--------------------------|----------------|
| A vs B          | 11.1484                          | $1.3687 \times 10^{-10}$ | $p < 0.01$           | $6.8437 \times 10^{-10}$ | $p < 0.01$     |
| A vs C          | 13.0624                          | $4.5652 \times 10^{-12}$ | $p < 0.01$           | $3.4239 \times 10^{-12}$ | $p < 0.01$     |
| A vs D          | 3.6194                           | 0.0052293                | $p < 0.01$           | 0.0013073                | $p < 0.01$     |
| A vs E          | 20.5505                          | 0.000                    | $p < 0.01$           | 0.000                    | $p < 0.01$     |
